# Supplementary material
Source: PubMed Central journal article supplement (PMC9629665)
Supplement: mmc1.pdf [file mmc1.pdf]

# THE LANCET

## Infectious Diseases

### Supplementary appendix

This appendix formed part of the original submission and has been peer reviewed. We post it as supplied by the authors.

Supplement to: Lapa D, Carletti F, Colavita F, et al. Viral replication and infectivity of monkeypox through semen: authors' reply. *Lancet Infect Dis* 2022; published online Sept 29. [https://doi.org/10.1016/S1473-3099\(22\)00613-2](https://doi.org/10.1016/S1473-3099(22)00613-2).

## **INMI Monkeypox Study Group**

Isabella Abbate, Alessandro Agresta, Alessandra Amendola, Andrea Antinori, Francesco Baldini, Tommaso Ascoli Bartoli, Alessia Beccacece, Rita Bellagamba, Giulia Berno, Aurora Bettini, Nazario Bevilacqua, Licia Bordi, Marta Camici, Fabrizio Carletti, Angela Corpolongo, Stefania Cicalini, Francesca Colavita, Alessandra D'Abramo, Gabriella De Carli, Federico De Zottis, Lavinia Fabeni, Francesca Faraglia, Federica Forbici, Concetta Maria Fusco, Roberta Gagliardini, Anna Rosa Garbuglia, Saba Gebremeskel, Maria Letizia Giancola, Emanuela Giombini, Enrico Girardi, Giulia Gramigna, Elisabetta Grilli, Susanna Grisetti, Cesare Ernesto Maria Gruber, Eleonora Lalle, Simone Lanini, Daniele Lapa, Gaetano Maffongelli, Fabrizio Maggi, Alessandra Marani, Andrea Mariano, Ilaria Mastroso, Giulia Matusali, Silvia Meschi, Valentina Mazzotta, Claudia Minosse, Klizia Mizioni, Martina Moccione, Annalisa Mondì, Vanessa Mondillo, Nicoletta Orchi, Sandrine Ottou, Carmela Pinnetti, Silvia Pittalis, Vincenzo Puro, Silvia Rosati, Gabriella Rozera, Martina Rueca, Laura Scorzolini, Eliana Specchiarello, Francesco Vaia, Francesco Vairo, Beatrice Valli, Alessandra Vergori, Serena Vita.
